# Supplementary material for: In situ construction of yolk–shell zinc cobaltite with uniform carbon doping for high performance asymmetric supercapacitors
Source: Royal Society of Chemistry journal article supplement (doi:10.1039/c8ta01759j), 2018-01-01
Supplement: c8ta01759j1.pdf [file c8ta01759j1.pdf]

**Electronic Supplementary Material (ESI) for Journal of Materials Chemistry A.  
This journal is © The Royal Society of Chemistry 2018**

*Supporting Information for*

**In situ construction of yolk-shell zinc cobaltite with uniform  
carbon doping for high performance asymmetric supercapacitor**

*Xiaoya Chang,<sup>a</sup> Lei Zang,<sup>a</sup> Song Liu,<sup>a</sup> Mengying Wang,<sup>a</sup> Huinan Guo,<sup>a</sup> Caiyun Wang<sup>\*b</sup> and Yijing  
Wang<sup>\*a</sup>*

<sup>a</sup>Key Laboratory of Advanced Energy Materials Chemistry (Ministry of Education), College of Chemistry, Nankai University, Tianjin 300071, China.

<sup>b</sup>ARC Centre of Excellence for Electromaterials Science, Intelligent Polymer Research Institute | AIIM Facility, University of Wollongong, NSW 2500, Australia.

\*Corresponding authors: [wangyj@nankai.edu.cn](mailto:wangyj@nankai.edu.cn), [caiyun@uow.edu.au](mailto:caiyun@uow.edu.au).

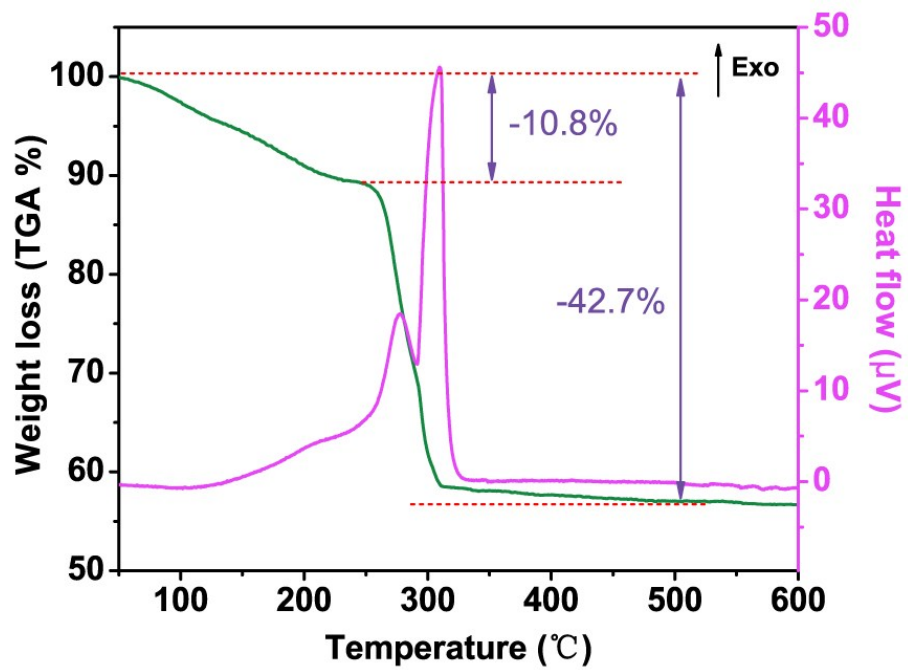

Fig. S1 TG-DCS curve of precursor ZnCo-glycolate under air flow at a heating rate of 10 °C min<sup>-1</sup>.

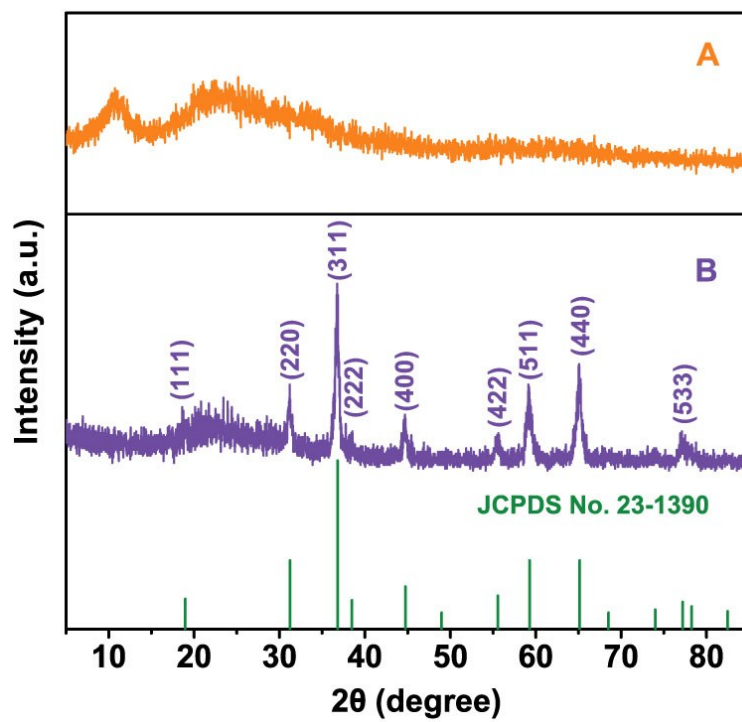

Fig. S2 XRD patterns of precursor ZnCo-glycolate (A) and ZnCo<sub>2</sub>O<sub>4</sub>/C (B).

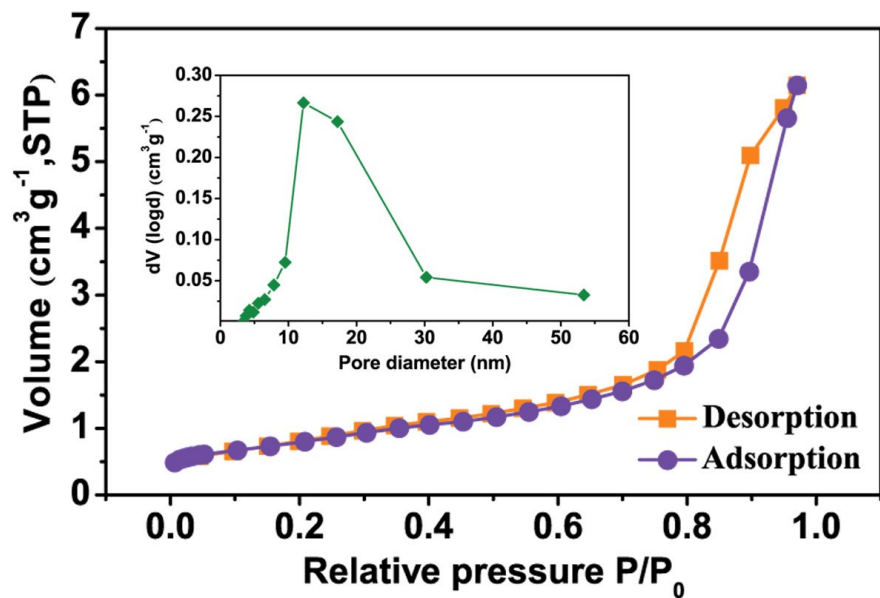

Fig. S3 Nitrogen adsorption-desorption isotherm of ZnCo<sub>2</sub>O<sub>4</sub>/C (Inset, pore size distribution curve).

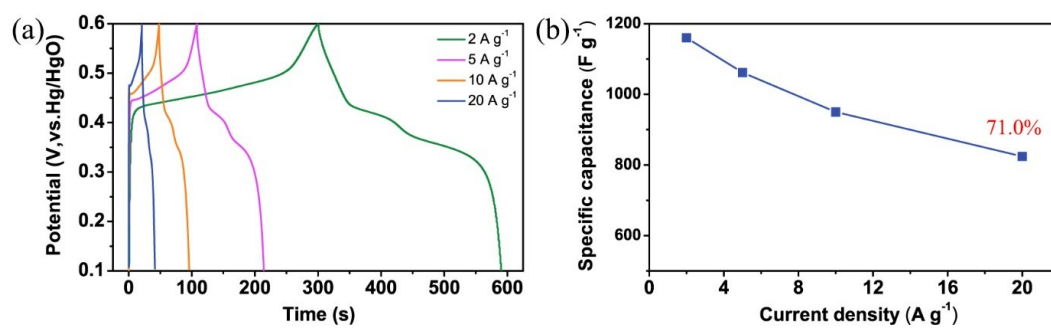

**Fig. S4** Galvanostatic charge-discharge curves (a), specific capacitance (b) of pristine ZnCo<sub>2</sub>O<sub>4</sub> at different current densities.

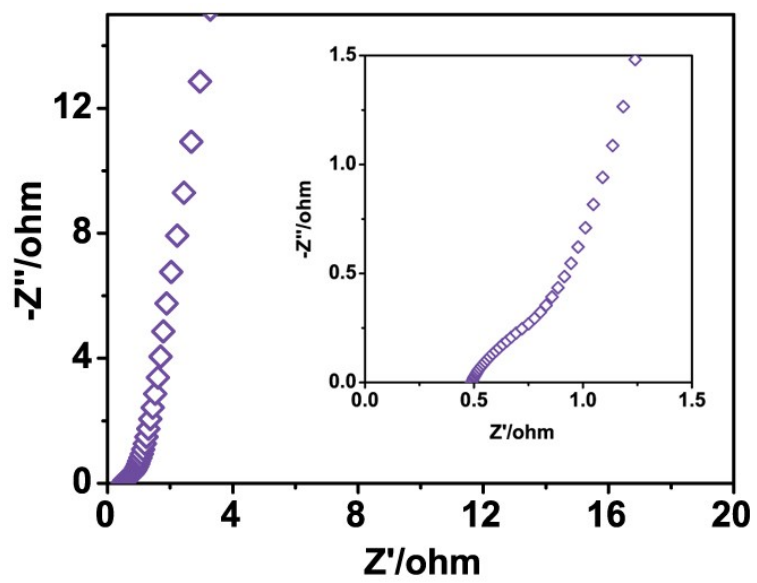

Fig. S5 EIS of pristine ZnCo<sub>2</sub>O<sub>4</sub>.

**Table S1** The comparison of the EIS results in this work with the previously reported literatures of similar material for supercapacitors.

| <b>Sample</b>                                                                         | <b><math>R_s</math> (<math>\Omega</math>)</b> | <b><math>R_{ct}</math> (<math>\Omega</math>)</b> | <b>Reference</b> |
|---------------------------------------------------------------------------------------|-----------------------------------------------|--------------------------------------------------|------------------|
| ZnCo <sub>2</sub> O <sub>4</sub>                                                      | 1.05                                          | 0.62                                             | 1                |
| ZnCo <sub>2</sub> O <sub>4</sub> @Ni <sub>x</sub> Co <sub>2x</sub> (OH) <sub>6x</sub> | 0.75                                          | 1.12                                             | 2                |
| ZnCo <sub>2</sub> O <sub>4</sub> /MnO <sub>2</sub>                                    | 0.72                                          | 2.5                                              | 3                |
| ZnCo <sub>2</sub> O <sub>4</sub>                                                      | 1.12                                          | 2.55                                             | 4                |
| <b>ZnCo<sub>2</sub>O<sub>4</sub>/C</b>                                                | <b>0.4</b>                                    | <b>0.1</b>                                       | <b>this work</b> |

**Table S2** The specific capacitance of the ZnCo<sub>2</sub>O<sub>4</sub>/C at different current densities.

| <b>Current density<br/>(A g<sup>-1</sup>)</b>      | 2    | 5    | 10   | 20   |
|----------------------------------------------------|------|------|------|------|
| <b>Specific capacitance<br/>(F g<sup>-1</sup>)</b> | 2064 | 1821 | 1680 | 1600 |



**Table S3** The comparison of the results in this work with the previously reported performance of similar material for supercapacitors.

| Sample                                                             | Microstructure           | Specific capacitance                                                                                                                                                                               | Cycle stability                                                        | Reference |
|--------------------------------------------------------------------|--------------------------|----------------------------------------------------------------------------------------------------------------------------------------------------------------------------------------------------|------------------------------------------------------------------------|-----------|
| ZnCo <sub>2</sub> O <sub>4</sub>                                   | Hexagonal                | 846 F g <sup>-1</sup> at 1 A g <sup>-1</sup>                                                                                                                                                       | 464 F g <sup>-1</sup> at 5 A g <sup>-1</sup><br>(95.3%, 5000 cycles)   | 5         |
| ZnCo <sub>2</sub> O <sub>4</sub>                                   | ring-like                | 1152 F g <sup>-1</sup> at 5 A g <sup>-1</sup>                                                                                                                                                      | 278 F g <sup>-1</sup> at 50 mV s <sup>-1</sup><br>(83.7%, 3000 cycles) | 6         |
| ZnCo <sub>2</sub> O <sub>4</sub> /rGO/NiO                          | nanowire arrays          | 1256 F g <sup>-1</sup> at 3 A g <sup>-1</sup>                                                                                                                                                      | 533 F g <sup>-1</sup> at 25 A g <sup>-1</sup><br>(80%, 3000 cycles)    | 7         |
| ZnCo <sub>2</sub> O <sub>4</sub>                                   | urchin-like microspheres | 1842 F g <sup>-1</sup> at 1 A g <sup>-1</sup>                                                                                                                                                      | 1390 F g <sup>-1</sup> at 10 A g <sup>-1</sup><br>(95.8%, 3000 cycles) | 8         |
| ZnCo <sub>2</sub> O <sub>4</sub>                                   | porous microspheres      | 647 F g <sup>-1</sup> at 1 A g <sup>-1</sup>                                                                                                                                                       | 590 F g <sup>-1</sup> at 1 A g <sup>-1</sup><br>(91.5%, 2000 cycles)   | 9         |
| ZnCo <sub>2</sub> O <sub>4</sub> /NiCo <sub>2</sub> O <sub>4</sub> | core-sheath nanowires    | 1476 F g <sup>-1</sup> at 1 A g <sup>-1</sup>                                                                                                                                                      | 1040 F g <sup>-1</sup> at 10 A g <sup>-1</sup><br>(98.9%, 2000 cycles) | 10        |
| ZnCo <sub>2</sub> O <sub>4</sub>                                   | mesoporous nanoflakes    | 1220 F g <sup>-1</sup> at 2 A g <sup>-1</sup>                                                                                                                                                      | 1149 F g <sup>-1</sup> at 2 A g <sup>-1</sup><br>(94.2%, 5000 cycles)  | 4         |
| ZnCo <sub>2</sub> O <sub>4</sub>                                   | nanorods                 | 1400 F g <sup>-1</sup> at 1 A g <sup>-1</sup>                                                                                                                                                      | 1078 F g <sup>-1</sup> at 6 A g <sup>-1</sup><br>(97%, 1000 cycles)    | 11        |
| ZnCo <sub>2</sub> O <sub>4</sub> /C                                | yolk-shell microspheres  | 2064 F g <sup>-1</sup> at 2 A g <sup>-1</sup><br>1821 F g <sup>-1</sup> at 5 A g <sup>-1</sup><br>1680 F g <sup>-1</sup> at 10 A g <sup>-1</sup><br>1600 F g <sup>-1</sup> at 20 A g <sup>-1</sup> | without any decay, 9000 cycles                                         | this work |

## Reference

- [1] S. Vijayakumar, S. Nagamuthu, S.-H. Lee and K.-S. Ryu, *Int. J. Hydrogen Energy*, 2017, **42**, 3122-3129.
- [2] W. Fu, Y. Wang, W. Han, Z. Zhang, H. Zha and E. Xie, *J. Mater. Chem. A*, 2016, **4**, 173-182.
- [3] K. Qiu, Y. Lu, D. Zhang, J. Cheng, H. Yan, J. Xu, X. Liu, J.-K. Kim and Y. Luo, *Nano Energy*, 2015, **11**, 687-696.
- [4] J. Cheng, Y. Lu, K. Qiu, H. Yan, X. Hou, J. Xu, L. Han, X. Liu, J.-K. Kim and Y. Luo, *Phys. Chem. Chem. Phys.*, 2015, **17**, 17016-17022.
- [5] V. Venkatachalam, A. Alsalmeh, A. Alswieleh and R. Jayavel, *Chem. Eng. J.*, 2017, **321**, 474-483.
- [6] G.M. Tomboc, H.S. Jadhav and H. Kim, *Chem. Eng. J.*, 2017, **308**, 202-213.
- [7] S. Sahoo and J.-J. Shim, *ACS Sustainable Chem. Eng.*, 2017, **5**, 241-251.
- [8] C. Wu, J. Cai, Q. Zhang, X. Zhou, Y. Zhu, L. Li, P. Shen and K. Zhang, *Electrochimica Acta*, 2015, **169**, 202-209.
- [9] Q. Wang, L. Zhu, L. Sun, Y. Liu and L. Jiao, *J. Mater. Chem. A*, 2015, **3**, 982-985.
- [10] Y. Huang, Y.-E. Miao, H. Lu and T. Liu, *Chem. Eur. J.*, 2015, **21**, 10100-10108.
- [11] B. Liu, B. Liu, Q. Wang, X. Wang, Q. Xiang, D. Chen and G. Shen, *ACS Appl. Mater. Interfaces*, 2013, **5**, 10011-10017.
